# Supplementary material
Source: PubMed Central journal article supplement (PMC2662389)
Supplement: NIHMS97114-supplement-1_si_001.pdf [file NIHMS97114-supplement-1_si_001.pdf]

## Synthesis of (+)-Coronafacic Acid

Douglass F. Taber\*, Ritesh B. Sheth, and Weiwei Tian

Department of Chemistry & Biochemistry, University of Delaware, Newark, DE 19716

### Supporting Information

#### Contents:

|            |                                                                  |
|------------|------------------------------------------------------------------|
| S-1        | Table of Contents                                                |
| S-2 to S-3 | General Experimental and Preparation of <b>1</b>                 |
| S-4        | <sup>1</sup> H NMR and <sup>13</sup> C NMR Spectrum of <b>2</b>  |
| S-5        | <sup>1</sup> H NMR and <sup>13</sup> C NMR Spectrum of <b>8</b>  |
| S-6        | <sup>1</sup> H NMR and <sup>13</sup> C NMR Spectrum of <b>9</b>  |
| S-7        | <sup>1</sup> H NMR and <sup>13</sup> C NMR Spectrum of <b>10</b> |
| S-8        | <sup>1</sup> H NMR and <sup>13</sup> C NMR Spectrum of <b>3</b>  |
| S-9        | <sup>1</sup> H NMR and <sup>13</sup> C NMR Spectrum of <b>4</b>  |
| S-10       | <sup>1</sup> H NMR and <sup>13</sup> C NMR Spectrum of <b>14</b> |
| S-11       | <sup>1</sup> H NMR and <sup>13</sup> C NMR Spectrum of <b>15</b> |
| S-12       | <sup>1</sup> H NMR and <sup>13</sup> C NMR Spectrum of <b>16</b> |

## Experimental Section

**General.**  $^1\text{H}$  NMR (at 400 MHz) and  $^{13}\text{C}$  NMR (at 400 MHz) spectra were obtained as solutions in deuteriochloroform ( $\text{CDCl}_3$ ). The infrared (IR) spectra were determined as neat oils.  $R_f$  values indicated refer to thin layer chromatography (TLC) on 5.0 x 10 cm, 250  $\mu\text{m}$  analytical plates coated with silica gel 60 F<sub>254</sub>, developed in the solvent system indicated. Column chromatography was carried out on using silica gel 60 particle size 0.015 – 0.040 mm. The solvent mixtures reported are volume/volume mixtures. EtOAc is ethyl acetate. All glassware was oven dried and reactions were carried out under a flow of nitrogen. All Wittig reactions were stirred magnetically, under dry  $\text{N}_2$  unless otherwise noted.  $\text{Fe}(\text{CO})_5$  mediated carbonylation was performed in a Rayonet reactor using a tube inside a tube setup, such that the reaction mixture is a thin layer between the outer tube and the inner tube.

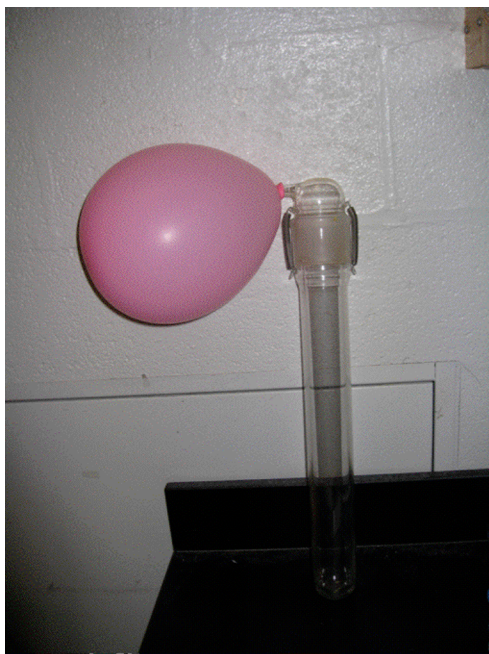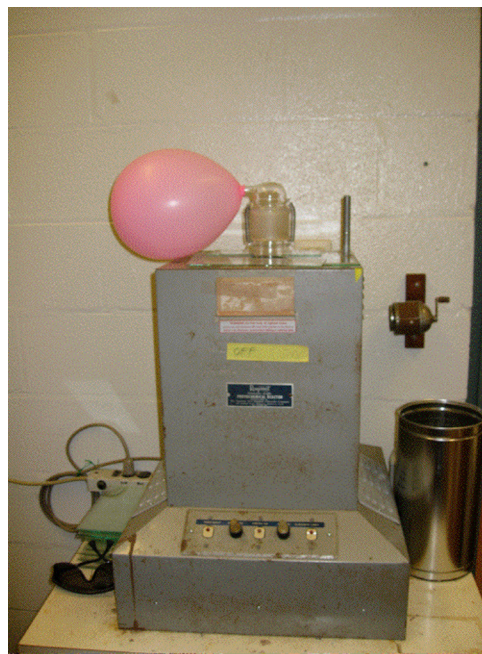

**Diazo ester 1:** 5-hexen-2-one (20 g, 200 mmol) was mixed with NaH (20 g) in toluene (200 mL) at rt. The mixture was heated to reflux for 10 min before dimethyl carbonate (56 g) was added dropwise over 30 min. Caution: the reaction is highly exothermic! After an additional 3 h at reflux, the mixture was partitioned between MTBE and 1N aqueous HCl and brine. The combined organic extract was dried ( $\text{Na}_2\text{SO}_4$ ) and concentrated. The residue was bulb to bulb distilled to afford the  $\beta$ -ketoester as a colorless oil (27.24 g, 86% yield). TLC  $R_f(\text{PE}/\text{MTBE} = 8/2) = 0.45$ . The  $\beta$ -ketoester (8.80 g, 56 mmol) was mixed with (+)-menthol (7.4 g), DMAP (1.15 g) and molecular sieve (4 Å, 12.5 g) in toluene (150 mL). The reaction mixture was heated to reflux overnight, then passed through a pad of silica gel. The eluant was concentrated and the residue was chromatographed to afford the menthol ester as a colorless oil (9.27 g, 60% yield). TLC  $R_f(\text{PE}/\text{MTBE} = 8/2) = 0.80$ . The  $\beta$ -ketoester (4.13 g, 14.7 mmol) was mixed with TEA (3.1 g, 30 mmol) and mesyl azide (2.7 g, 22 mmol) in MeCN (50 mL) at rt. After 8 h the solvent was removed *in vacuo*. The residue was partitioned between MTBE and 1N aqueous NaOH, saturated aqueous  $\text{NaHCO}_3$  and brine. The combined organic extract was dried ( $\text{Na}_2\text{SO}_4$ ) and concentrated. The residue was chromatographed to afford the diazo ester **1** as a colorless oil (4.36 g, 72% yield). TLC  $R_f(\text{PE}/\text{MTBE} = 8/2) = 0.50$ . The spectroscopic data was consistent with those that were earlier reported.<sup>11a</sup>

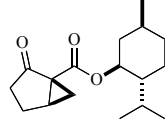

2

2  
 FROTON\_16 CDC13 /opt/topspin sheth 34

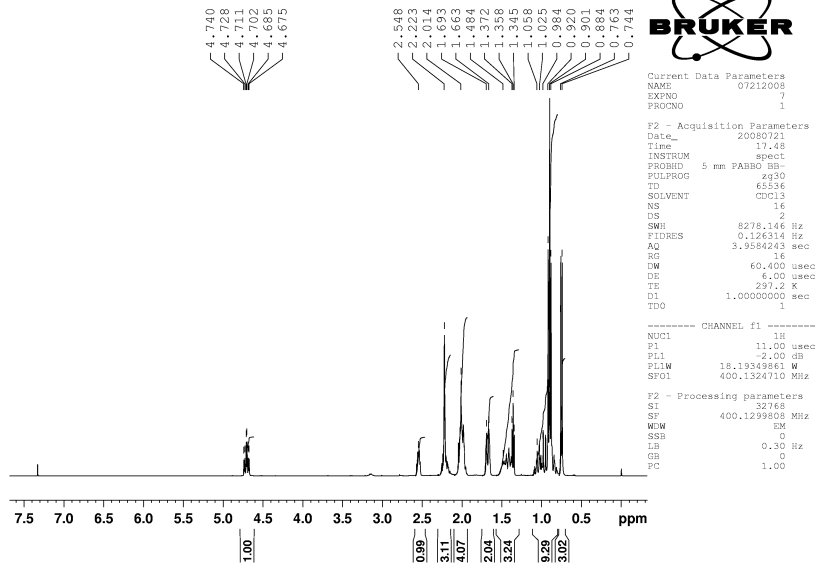

2  
 C13APT256 CDC13 /opt/topspin sheth 34

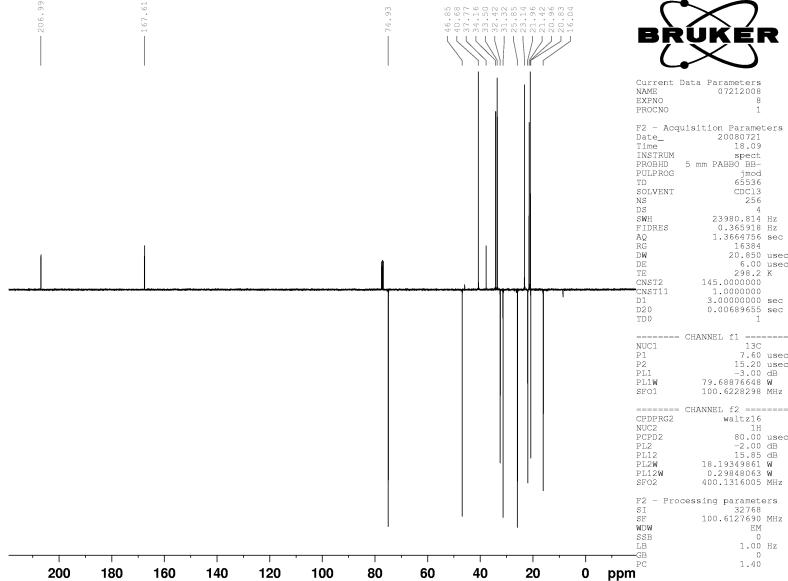

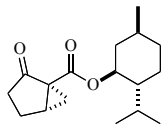

8

8  
PROTON\_16 CDC13 /opt/topspin sheth 59

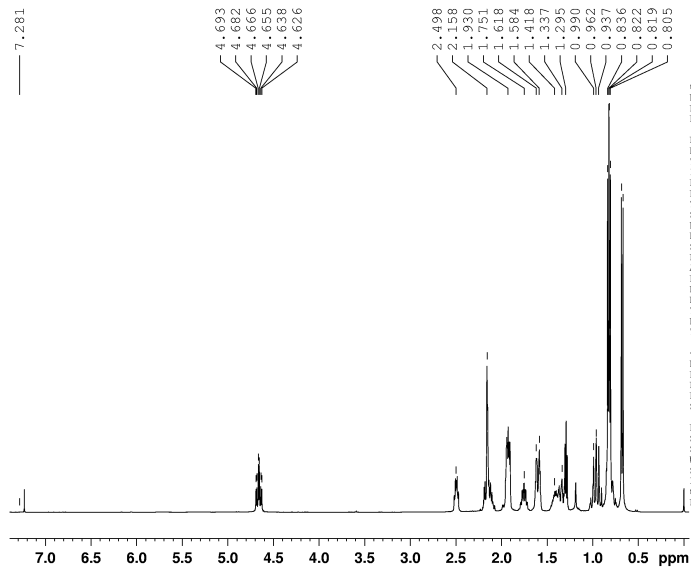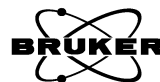

Current Data Parameters  
 NAME 10282008  
 EXPNO 1  
 PROCNO 1

F2 - Acquisition Parameters  
 Date\_ 20081028  
 Time 10.56  
 INSTRUM spect  
 PROBHD 5 mm PABBO BB-  
 PULPROG zg30  
 TD 65536  
 SOLVENT CDCl3  
 NS 16  
 DS 2  
 SWH 8278.146 Hz  
 FIDRES 0.126314 Hz  
 AQ 3.9584243 sec  
 RG 25.4  
 DW 60.400 usec  
 DE 4.00 usec  
 TE 298.2 K  
 D1 1.0000000 sec  
 TDO 1

----- CHANNEL f1 -----  
 NUC1 1H  
 P1 11.00 usec  
 PL1 -2.00 dB  
 PL1W 18.19349861 W  
 SF01 400.1324710 MHz

F2 - Processing parameters  
 SI 32768  
 SF 400.1300213 MHz  
 WNW EM  
 SSB 0  
 LB 0.30 Hz  
 GB 0  
 PC 1.00

8  
C13APT256 CDC13 /opt/topspin sheth 59

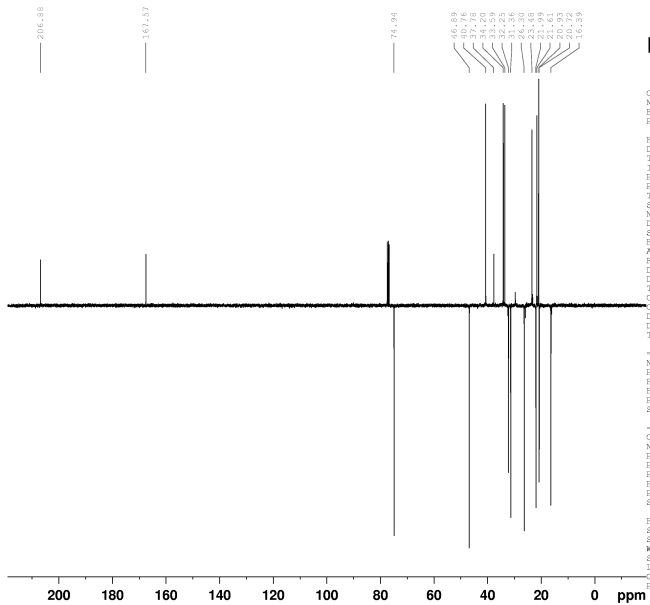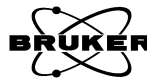

Current Data Parameters  
 NAME 10282008  
 EXPNO 2  
 PROCNO 1

F2 - Acquisition Parameters  
 Date\_ 20081028  
 Time 11.17  
 INSTRUM spect  
 PROBHD 5 mm PABBO BB-  
 PULPROG jmod  
 TD 65536  
 SOLVENT CDCl3  
 NS 256  
 DS 4  
 SWH 23980.814 Hz  
 FIDRES 0.393938 Hz  
 AQ 1.3664756 sec  
 RG 16384  
 DW 20.850 usec  
 DE 6.50 usec  
 TE 299.2 K  
 CNST2 145.0000000  
 NSFT1 1.0000000  
 D1 3.0000000 sec  
 D20 0.00664655 sec  
 TDO 1

----- CHANNEL f1 -----  
 NUC1 13C  
 P1 7.60 usec  
 P2 15.20 usec  
 PL1 -3.00 dB  
 PL1W 79.68876448 W  
 SF01 100.6228298 MHz

----- CHANNEL f2 -----  
 CPDPRG2 waltz16  
 NUC2 1H  
 PCPD2 80.00 usec  
 PL2 -2.00 dB  
 PL2 15.85 dB  
 PL2W 18.19349861 W  
 PL12W 0.29848063 W  
 SF02 400.1316005 MHz

F2 - Processing parameters  
 SI 32768  
 SF 100.6127690 MHz  
 WNW EM  
 SSB 0  
 LB 1.00 Hz  
 GB 0  
 PC 1.40



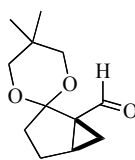

10

10  
PROTON\_16 CDC13 /opt/topspin sheth 21

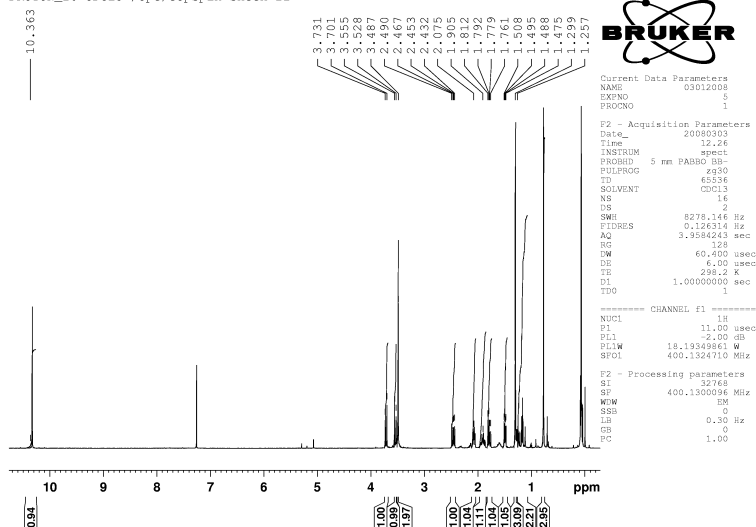

10  
C13APT256 CDC13 /opt/topspin sheth 21

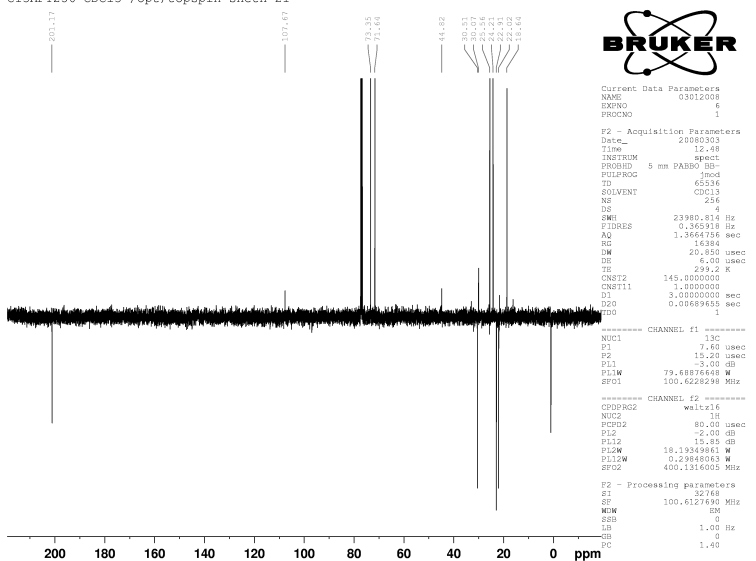

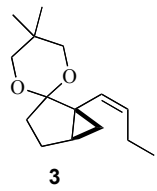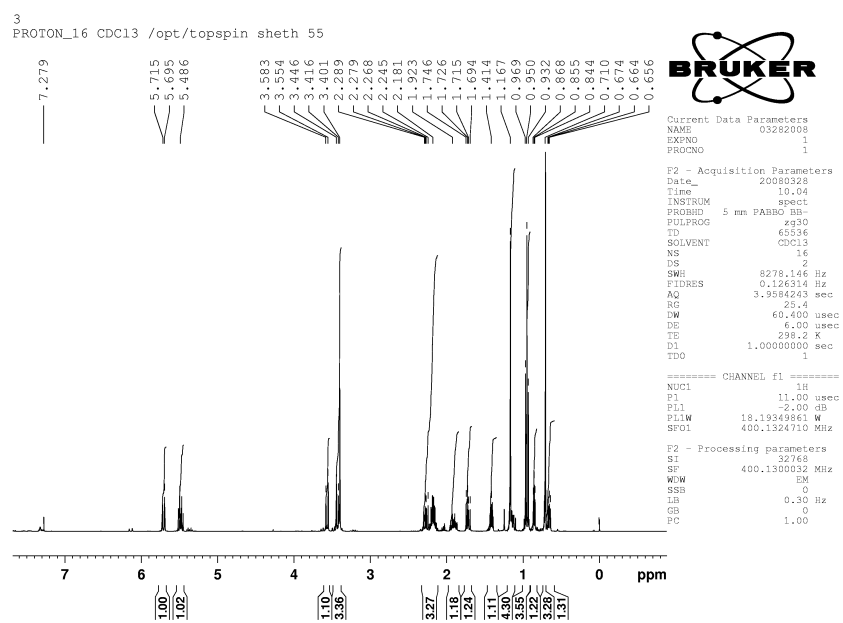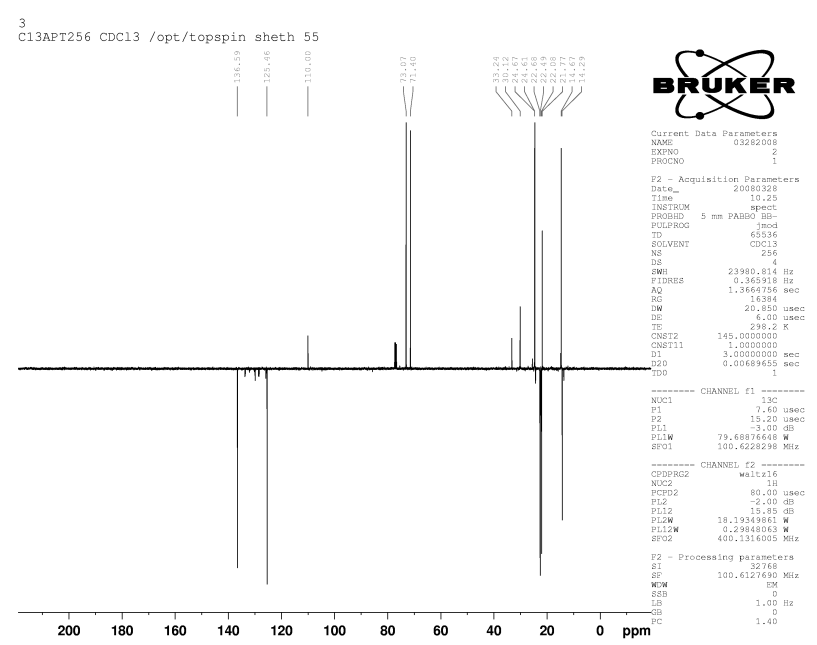



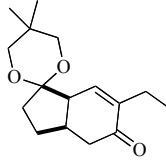

4

4  
PROTON\_16 CDCl3 /opt/topspin sheth 7

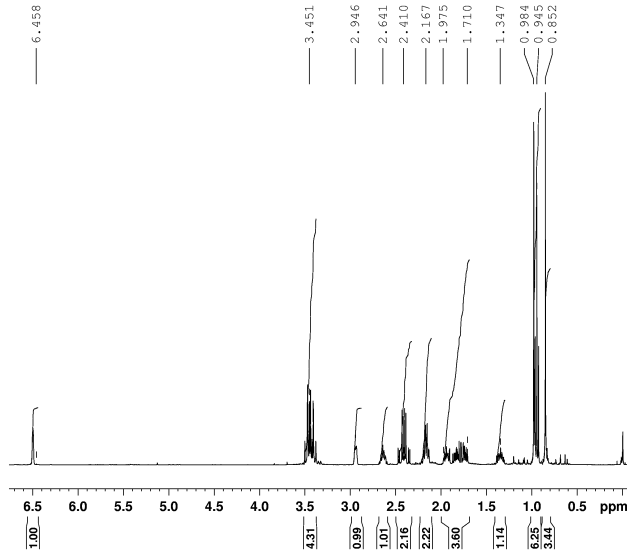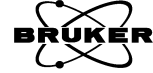

Current Data Parameters  
NAME 03052008  
EXNO 1  
PROGNO 1

F2 - Acquisition Parameters  
Date\_ 20080306  
Time 7.39  
INSTRUM spect  
PROBHD 5 mm PABBO BB-  
PULPROG zg30  
TD 65536  
SOLVENT CDCl3  
NS 16  
DS 2  
SWH 8278.146 Hz  
FIDRES 0.126314 Hz  
AQ 3.958243 sec  
RG 35.9  
DM 60.400 usec  
DE 6.00 usec  
TE 298.2 K  
D1 1.00000000 sec  
TD0 1

===== CHANNEL f1 =====  
NUC1 1H  
P1 11.00 usec  
PL1 2.00 dB  
PL1W 18.19349861 W  
SFO1 400.1324710 MHz

F2 - Processing parameters  
SI 32768  
SF 400.1300305 MHz  
WDW EM  
SSB 0  
LB 0.30 Hz  
GB 0  
PC 1.00

4  
C13APT256 CDCl3 /opt/topspin sheth 7

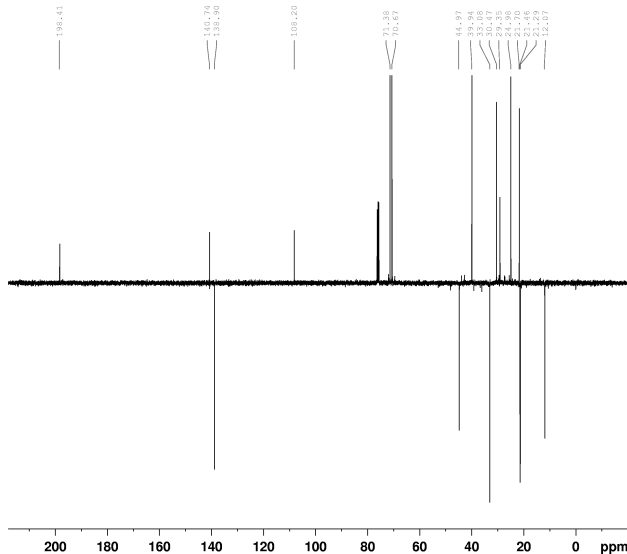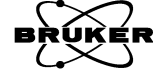

Current Data Parameters  
NAME 03052008  
EXNO 2  
PROGNO 1

F2 - Acquisition Parameters  
Date\_ 20080306  
Time 8.00  
INSTRUM spect  
PROBHD 5 mm PABBO BB-  
PULPROG jmod  
TD 65536  
SOLVENT CDCl3  
NS 256  
DS 4  
SWH 23980.814 Hz  
FIDRES 0.345918 Hz  
AQ 1.3664756 sec  
RG 18.868  
DM 20.850 usec  
DE 6.00 usec  
TE 298.2 K  
CNSFZ 145.0000000  
CNSF1 1.00000000  
D1 3.00000000 sec  
M20 0.00689650 sec  
TD0 1

===== CHANNEL f1 =====  
NUC1 13C  
P1 7.40 usec  
PL1 15.20 usec  
PL1 8.00 dB  
PL1W 79.68876648 W  
SFO1 100.6228298 MHz

===== CHANNEL f2 =====  
CPDPRG2 waltz16  
NUC2 1H  
PCPD2 80.00 usec  
PL2 -2.00 dB  
PL2 15.20 dB  
PL2W 18.19349861 W  
PL2W 0.23848063 W  
SFO2 400.1316000 MHz

F2 - Processing parameters  
SI 32768  
SF 100.6128718 MHz  
WDW EM  
SSB 0  
LB 1.00 Hz  
GB 0  
PC 1.40

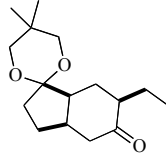

14

14  
PROTON\_16 CDC13 /opt/topspin sheth 5

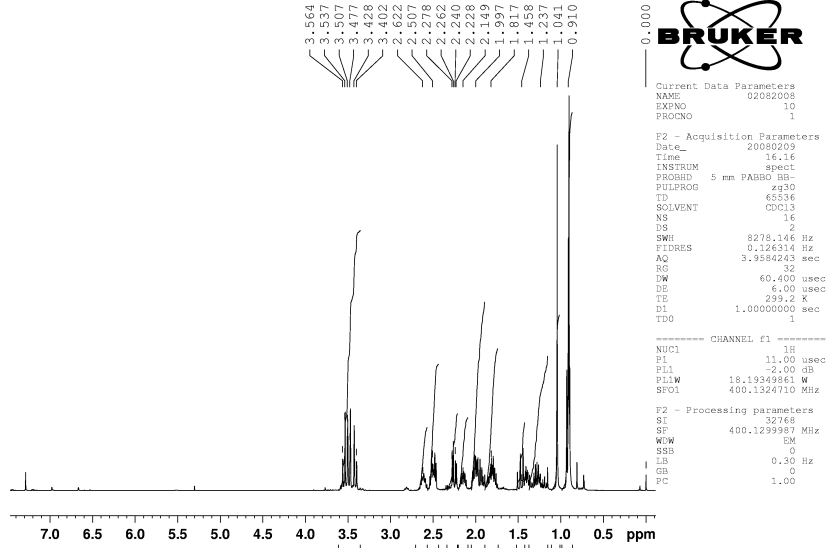

14  
C13APT256 CDC13 /opt/topspin sheth 5

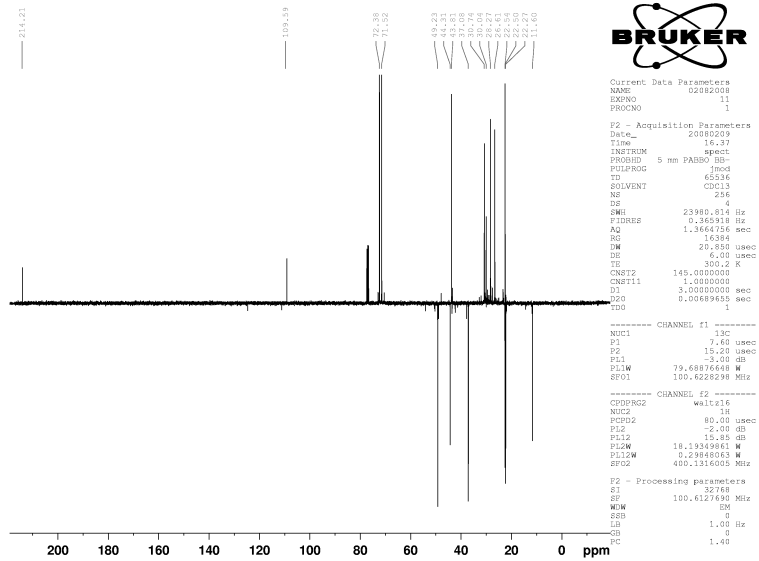

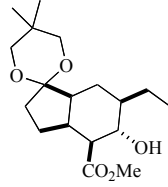

15

15  
PROTON\_16 CDC13 /opt/topspin sheth 41

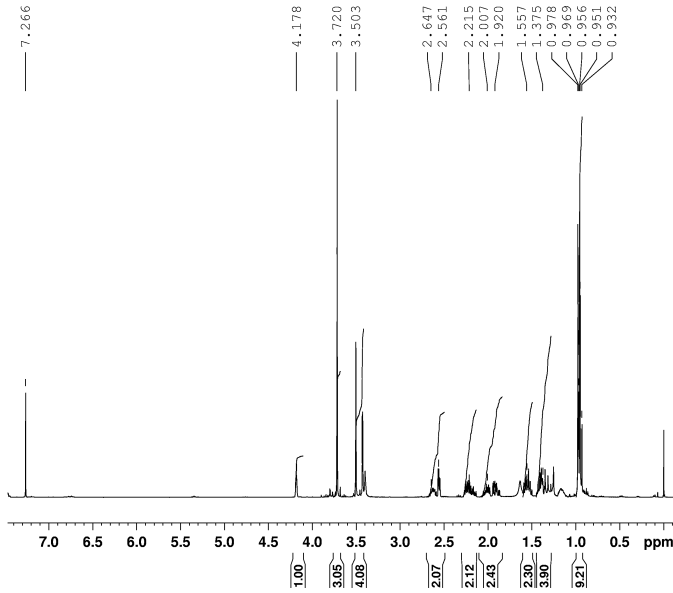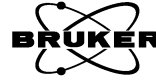

Current Data Parameters  
NAME 06042008  
EXPNO 1  
PROCNO 1

F2 - Acquisition Parameters  
Date\_ 20080604  
Time 11.10  
INSTRUM spect  
PROBHD 5 mm PABBO BB-  
PULPROG zg30  
TD 65536  
SOLVENT CDCl3  
NS 16  
DS 2  
SWH 8278.146 Hz  
FIDRES 0.126314 Hz  
AQ 3.9564243 sec  
RG 128  
DW 60.400 usec  
DE 4.00 usec  
TE 298.2 K  
D1 1.00000000 sec  
TDO 1

----- CHANNEL f1 -----  
NUC1 1H  
P1 11.00 usec  
PL1 -2.00 dB  
PL1W 18.19349861 W  
SFO1 400.1324710 MHz

F2 - Processing parameters  
SI 32768  
SF 400.1300073 MHz  
WDW EM  
SSB 0  
LB 0.30 Hz  
GB 0  
PC 1.00

15  
C13APT256 CDC13 /opt/topspin sheth 41

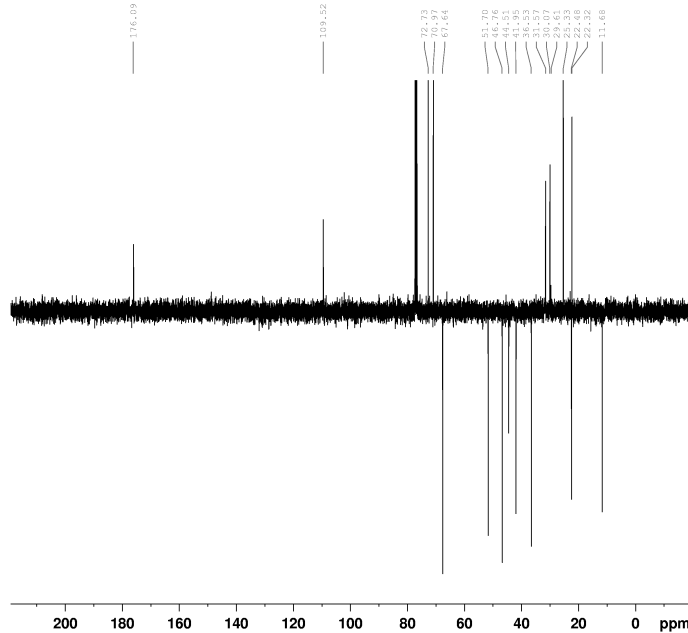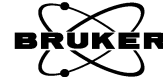

Current Data Parameters  
NAME 06042008  
EXPNO 2  
PROCNO 1

F2 - Acquisition Parameters  
Date\_ 20080604  
Time 11.21  
INSTRUM spect  
PROBHD 5 mm PABBO BB-  
PULPROG meol  
TD 65536  
SOLVENT CDCl3  
NS 256  
DS 4  
SWH 23980.814 Hz  
FIDRES 0.365918 Hz  
AQ 1.3664758 sec  
RG 16384  
DW 20.850 usec  
DE 4.00 usec  
TE 298.2 K  
D1 145.0000000  
D11 1.0000000  
D1 3.0000000 sec  
D20 0.00689652 sec  
TDO 1

----- CHANNEL f1 -----  
NUC1 13C  
P1 7.00 usec  
P2 15.20 usec  
PL1 -3.00 dB  
PL2 15.85 dB  
PL1W 79.68376568 W  
SFO1 100.6228298 MHz

----- CHANNEL f2 -----  
CPDPRG2 waltz16  
NUC2 1H  
PCPD2 80.00 usec  
PL2 -2.00 dB  
PL12 15.85 dB  
PL2W 18.19349861 W  
PL12W 0.29848063 W  
SFO2 400.1316003 MHz

F2 - Processing parameters  
SI 32768  
SF 100.6127690 MHz  
WDW EM  
SSB 0  
LB 1.00 Hz  
GB 0  
PC 1.40

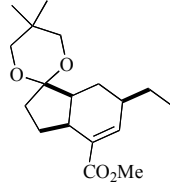

16  
PROTON\_512 CDC13 /opt/topspin sheth 48

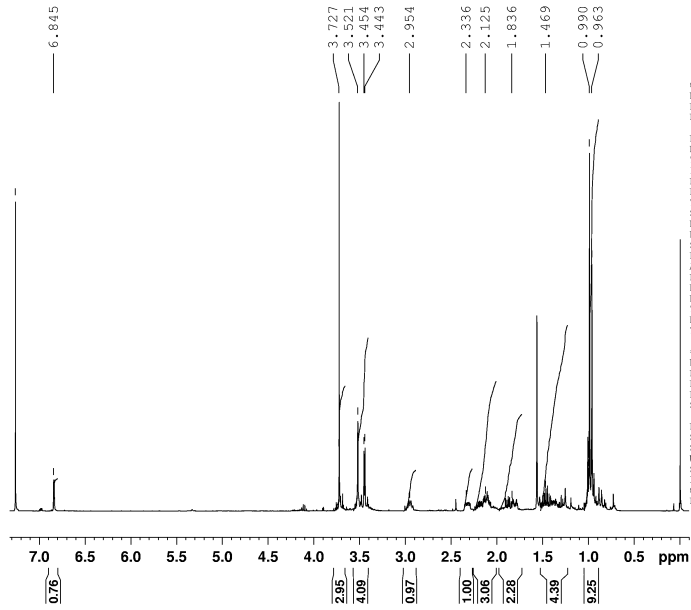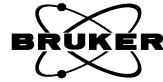

```

Current Data Parameters
NAME      D7082008
EXPNO    1
PROCNO   1

F2 - Acquisition Parameters
Date_    20080709
Time     0.18
INSTRUM  spect
PROBHD   5 mm PABBO BB-
PULPROG  zg30
TD       65536
SOLVENT  CDC13
NS       512
DS       2
SWH      8278.146 Hz
FIDRES   0.126134 Hz
AQ       3.9584243 sec
RG       228.1
DW       60.400 usec
DE       6.00 usec
TE       297.2 K
D1       1.0000000 sec
TDO      1

===== CHANNEL f1 =====
NUC1     1H
P1       11.00 usec
PL1      -2.00 dB
PL12     18.19349861 W
SFO1     400.1324710 MHz

F2 - Processing parameters
SI       32768
SF       400.1300098 MHz
WDW      EM
SSB      0
LB       0.30 Hz
GB       0
PC       1.00
  
```

16  
C13APT1028 CDC13 /opt/topspin sheth 48

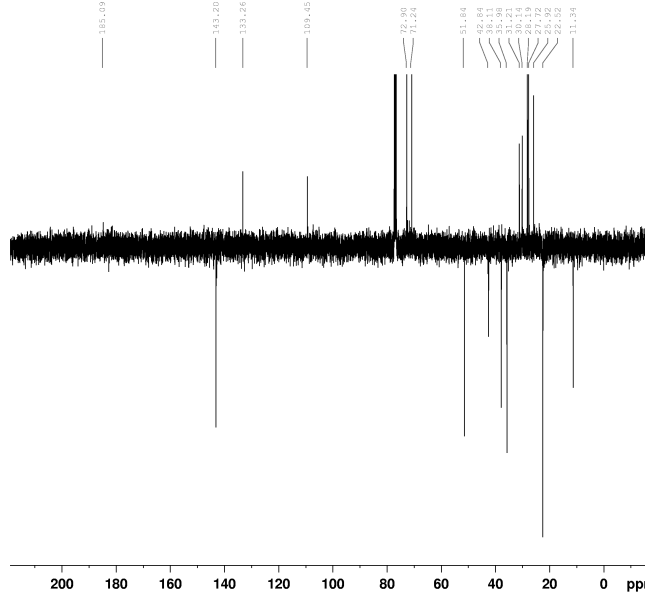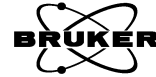

```

Current Data Parameters
NAME      D7082008
EXPNO    2
PROCNO   1

F2 - Acquisition Parameters
Date_    20080709
Time     1.36
INSTRUM  spect
PROBHD   5 mm PABBO BB-
PULPROG  jmod
TD       65536
SOLVENT  CDC13
NS       1024
DS       4
SWH      23980.814 Hz
FIDRES   0.365918 Hz
AQ       1.3664156 sec
RG       16384
DW       20.850 usec
DE       6.00 usec
TE       298.2 K
D1       3.0000000 sec
D2       0.00689655 sec
TDO      1

===== CHANNEL f1 =====
NUC1     13C
P1       7.60 usec
PL1      -3.00 dB
PL12     79.68976648 W
SFO1     100.6283298 MHz

===== CHANNEL f2 =====
CPDPRG2  waltz16
NUC2     1H
PCPD2    80.00 usec
PL2      -2.00 dB
PL12     18.19349861 W
PL2W     18.19349861 W
PL12W    0.29848063 W
SFO2     400.1316032 MHz

F2 - Processing parameters
SI       32768
SF       100.6127690 MHz
WDW      EM
SSB      0
LB       1.00 Hz
GB       0
PC       1.40
  
```
